# Supplementary material for: Adverse Events during Vitreoretinal Surgery under Adequacy of Anesthesia Guidance—Risk Factor Analysis
Source: MDPI journal article supplement (doi:10.3390/ph15020237), 2022-02-16
Supplement: s1 [file s1]

**Table S1.** Characteristics of the patients participating in the study

| Anthropometric Data                                                                      |                         | Total<br><i>n</i> = 175<br>(100%) | GA<br>Group<br><i>n</i> = 35<br>(20%) | M<br>Group<br><i>n</i> = 35<br>(20%) | P Group<br><i>n</i> = 35<br>(20%) | PBB<br>Group<br><i>n</i> = 35<br>(20%) | T Group<br><i>n</i> = 35<br>(20%) | <i>p</i> -<br>Value                   |
|------------------------------------------------------------------------------------------|-------------------------|-----------------------------------|---------------------------------------|--------------------------------------|-----------------------------------|----------------------------------------|-----------------------------------|---------------------------------------|
| The results of the one-way analysis of variance (ANOVA)/the Kruskal–Wallis test by ranks |                         |                                   |                                       |                                      |                                   |                                        |                                   |                                       |
| Age<br>X ± S<br>M (Rk)                                                                   | [years]                 | 64.5 ± 11.7<br>66 (13)            | 65.1 ±<br>10.8<br>67 (9)              | 61.9 ±<br>11.9<br>63 (14)            | 66.1 ± 9.9<br>67 (8)              | 66.8 ±<br>12.1<br>69 (13)              | 62.7 ±<br>13.3<br>65 (14)         | <i>p</i> =<br>0.25 <sup>a</sup><br>NS |
| High<br>X ± S<br>M (Rk)                                                                  | [cm]                    | 165.8 ± 8.7<br>165 (12)           | 166.9 ±<br>8.6<br>168 (14)            | 168 ± 7.4<br>170 (14)                | 163.4 ±<br>8.7<br>160 (12)        | 165.9 ±<br>8.3<br>164 (12)             | 164.7 ±<br>10.3<br>164 (18)       | <i>p</i> =<br>0.18 <sup>a</sup><br>NS |
| Weight<br>X ± S<br>M (Rk)                                                                | [kg]                    | 77.6 ± 15.9<br>75.5 (17)          | 83.4 ±<br>19.8<br>82 (20)             | 74.7 ±<br>14.9<br>74 (19)            | 74.1 ±<br>13.3<br>74 (22)         | 78.8 ± 16<br>75 (11)                   | 77.1 ±<br>13.7<br>80 (21)         | <i>p</i> =<br>0.19 <sup>a</sup><br>NS |
| BMI<br>X ± S<br>M (Rk)                                                                   | [kg/m <sup>2</sup> ]    | 28.3 ± 5.4<br>27.5 (6.4)          | 29.9 ± 6.6<br>28.4 (5.3)              | 26.4 ± 4.6<br>25.3 (5.4)             | 27.9 ± 5.3<br>27.6 (7.7)          | 28.6 ± 5.1<br>27.1 (4.4)               | 28.5 ± 4.9<br>28.4 (7.3)          | <i>p</i> =<br>0.05 <sup>a</sup>       |
| The results of the $\chi^2$ test of independence                                         |                         |                                   |                                       |                                      |                                   |                                        |                                   |                                       |
| Gender<br><i>n</i> (%)                                                                   | Female                  | 97 (55.4)                         | 18 (51.4)                             | 15 (42.9)                            | 24 (68.6)                         | 21 (60)                                | 19 (54.3)                         | <i>p</i> =<br>0.26 <sup>b</sup><br>NS |
|                                                                                          | Male                    | 78 (44.6)                         | 17 (48.6)                             | 20 (57.1)                            | 11 (31.4)                         | 14 (40)                                | 16 (45.7)                         |                                       |
| Diabetes<br>Mellitus                                                                     | Insulin-<br>dependent   | 53 (30.3)                         | 11 (31.4)                             | 6 (17.1)                             | 12 (34.3)                         | 12 (34.3)                              | 12 (34.3)                         | <i>p</i> =<br>0.45 <sup>b</sup><br>NS |
|                                                                                          | Insulin-<br>independent | 45 (25.7)                         | 10 (28.6)                             | 3 (8.6)                              | 12 (34.3)                         | 9 (25.7)                               | 11 (31.4)                         | <i>p</i> =<br>0.11 <sup>b</sup><br>NS |
| The results of the multiple proportions test                                             |                         |                                   |                                       |                                      |                                   |                                        |                                   |                                       |
| BMI<br><i>n</i> (%)                                                                      | Norm                    | 50 (28.7)                         | 5 (14.3)                              | 15 (42.9)                            | 14 (40)                           | 7 (20.6)                               | 9 (25.7)                          | <i>p</i> <<br>0.05 <sup>c</sup>       |
|                                                                                          | Overweight              | 72 (41.4)                         | 18 (51.4)                             | 13 (37.1)                            | 9 (25.7)                          | 19 (55.9)                              | 13 (37.1)                         | <i>p</i> =<br>0.09 <sup>c</sup><br>NS |
|                                                                                          | Obesity                 | 52 (29.9)                         | 12 (34.3)                             | 7 (20)                               | 12 (34.3)                         | 8 (23.5)                               | 13 (37.1)                         | <i>p</i> =<br>0.41 <sup>c</sup><br>NS |

Results are presented as means ± standard deviations and medians (interquartile ranges). <sup>a</sup> One-way analysis of variance (ANOVA)/the Kruskal–Wallis test by ranks. Nominal data are presented as numbers (percentages). <sup>b</sup>  $\chi^2$  test of independence. <sup>c</sup> Multiple proportions test. BMI, body mass index. MAP—Mean Arterial Pressure; SAP—Systolic Arterial Pressure; DAP—Diastolic Arterial Pressure; PBB—preprocedural peribulbar block group; M group—metamizole group; P—Paracetamol
